# Supplementary material for: Prognostic Role of Tumor Microenvironment in DLBCL and Relation to Patients’ Clinical Outcome: A Clinical and Immunohistochemical Study
Source: Hindawi journal article supplement (doi:10.1155/2022/9993496), 2022-01-17
Supplement: f1 [file 9993496.f1.pdf]

DLBCL SHOWED NO PROGNOSTIC  
RELATION WITH TUMOR  
MICROENVIRONMENT

MICROENVIRONMENT  
MARKERS CD4 CD8 CD 68  
MMP1  
IMMUNOHISTOCHEMISTRY

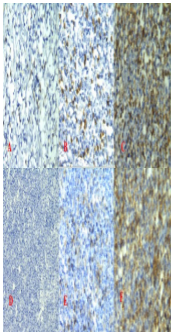

Lymphoma Immune stain expression grades
